# Supplementary material for: Conversion/alloying lithium-ion anodes – enhancing the energy density by transition metal doping
Source: Royal Society of Chemistry journal article supplement (doi:10.1039/c8se00424b), 2018-01-01
Supplement: c8se00424b1.pdf [file c8se00424b1.pdf]

## Supplementary Information

### Conversion/alloying lithium-ion anodes – Enhancing the energy density by transition metal doping

Yanjiao Ma,<sup>a,b</sup> Yuan Ma,<sup>a,b</sup> Gabriele Giuli,<sup>c</sup> Thomas Diemant,<sup>d</sup> R. Jürgen Behm,<sup>a,d</sup> Dorin Geiger,<sup>e</sup>  
Ute Kaiser,<sup>e</sup> Ulderico Ulissi,<sup>a,b</sup> Stefano Passerini,<sup>a,b,\*</sup> and Dominic Bresser<sup>a,b,\*</sup>

<sup>a</sup> Helmholtz Institute Ulm (HIU), Helmholtzstrasse 11, 89081 Ulm, Germany

<sup>b</sup> Karlsruhe Institute of Technology (KIT), P.O. Box 3640, 76021 Karlsruhe, Germany

<sup>c</sup> School of Science and Technology – Geology Division, University of Camerino, Via Gentile III da Varano,  
62032 Camerino, Italy

<sup>d</sup> Institute of Surface Chemistry and Catalysis, Ulm University, 89081 Ulm, Germany

<sup>e</sup> Central Facility for Electron Microscopy, Group of Electron Microscopy of Materials Science, Ulm University,  
89081 Ulm, Germany

\*Corresponding authors: [stefano.passerini@kit.edu](mailto:stefano.passerini@kit.edu) ; [dominic.bresser@kit.edu](mailto:dominic.bresser@kit.edu)

## Experimental Section

*Materials synthesis.* Transition metal (TM) doped SnO<sub>2</sub>, i.e., Fe-doped SnO<sub>2</sub> (Sn<sub>0.9</sub>Fe<sub>0.1</sub>O<sub>2</sub>, SFO), Mn-doped SnO<sub>2</sub> (Sn<sub>0.9</sub>Mn<sub>0.1</sub>O<sub>2</sub>, SMO), and Co-doped SnO<sub>2</sub> (Sn<sub>0.9</sub>Co<sub>0.1</sub>O<sub>2</sub>, SCO), were synthesized by dissolving 0.001 mol of the corresponding transition metal precursor (iron gluconate dehydrate (Aldrich), manganese (II) acetate tetrahydrate (ACROS), or cobalt (II) gluconate hydrate (ABCR)), and 0.03 mol of sucrose (ACROS) in 100 mL deionized water. Subsequently, 0.009 mol of tin(II) acetate (Aldrich) and 20 mL acetic acid (Aldrich) were gradually added. After stirring the solution for 30 min at room temperature, the water was evaporated at 160 °C, while the sucrose started to be thermally decomposed. The resulting solid precursor was calcined for 3 h under air at 450 °C with an increment of 3°C min<sup>-1</sup>. The pure SnO<sub>2</sub> was prepared analogously without adding the transition metal precursor. For the application of the carbon coating, 1.2 g glucose were dissolved in 80 mL deionized water before adding 800 mg of the corresponding active material (SnO<sub>2</sub>, SFO, SMO, or SCO) under continuous stirring. The obtained suspension was transferred into a stainless steel autoclave (BERGHOF BR-100) and heated at 180 °C for 13 h under stirring (1000 rpm). The precipitate was collected by centrifugation, washed several times with deionized water and ethanol, and dried at 60 °C overnight. Finally, the dry composite was thermally treated at 500 °C for 4 h under argon atmosphere (heating rate: 3°C min<sup>-1</sup>).

*Physicochemical characterization.* The crystal structure of the samples was investigated *via* powder X-ray diffraction (XRD) using either a Bruker D8 Advance (Cu-K $\alpha$ 1 radiation,  $\lambda = 0.154$  nm) or an automated Philips Bragg-Brentano diffractometer equipped with a graphite monochromator. For the latter, the long-fine focus copper tube was operated at 40 kV and 25 mA and the patterns were recorded in a  $2\theta$  range of 20-145° with a step size of 0.03° and a counting time of 14 s. For the refinement of the XRD data, the program GSAS was used<sup>1</sup>. The shape of the reflections was modeled with a Pseudo-Voigt function and the FWHM (full width at half maximum) was refined as a function of  $2\theta$  taking into consideration the Gaussian as well as the Lorentzian broadening. The refinement was conducted for the space group  $P4_2/mnm$  using the starting atomic coordinates reported by Bolzan *et al.*<sup>2</sup> and an initial value for the isotropic temperature factors ( $U_{iso}$ ) arbitrarily chosen as 0.025 Å<sup>2</sup>. The O atom sites were designated as fully occupied, while constraints for fractional occupancies for Sn, Fe, Mn, and Co were used according to the stoichiometry of the synthesized samples. The background was modeled applying a 9-terms polynomial function. This function, the cell parameters, and the scale factor were set as free variables during the refinement. Additional parameters were added for the refinement in the following order:  $2\theta$  zero-shift, peak shape, peak asymmetry, atomic coordinates, and isotropic thermal factor. The intensity cut-off for the calculation of the profile step intensity was initially set to 1.0% of the peak maximum and eventually lowered to 0.1%. Final convergence was considered to be reached, when the parameter shifts were <1% of their respective estimated standard deviation. The estimated errors, provided by the Rietveld refinement program, are  $\pm 0.0001$  Å for the cell parameters and  $\pm 0.002$  Å for the selected interatomic distances. Nonetheless, these values are presumably too optimistic, since they do not include the potential correlation between different parameters and other potential error sources

such as, for instance, the overlapping of reflections. To get an alternative estimation of the accuracy of the thus refined data, we compared the obtained set of parameters applying different refinement strategies on the same set of data. This comparison revealed that a more realistic estimation of the errors bars are approximately  $\pm 0.0005 \text{ \AA}$  for the cell parameters and  $\pm 0.005 \text{ \AA}$  for the selected interatomic distances, while the potential error for the determination of any phase content is  $\pm 1 \text{ wt\%}$ . Employing anisotropic thermal parameters resulted in a slight reduction of all the disagreement indexes reported herein, but the unit cell parameters as well as the individual interatomic distances remained unaffected. In this manuscript, we provide the results obtained using isotropic temperature factors in the refinement procedure. Raman spectra were collected with a 532 nm laser excitation and a power of 20 mW using a Renishaw 2000. Each spectrum was taken as the average of three accumulations with 60 seconds of acquisition. X-ray photoelectron spectroscopy (XPS) measurements were carried out in a PHI 5800 Multi Technique ESCA system (Physical Electronic, USA). The spectra were acquired using monochromatic Al K $\alpha$  (1486.6 eV) radiation, a take-off angle of 45°, and pass energies at the electron analyzer of 29.35 and 93.9 eV for the detail and survey scans, respectively. The main C1s peak was used for the binding energy calibration and set to 284.8 eV, corresponding to adventitious carbon on the surface of the powder samples. The particle morphology was studied by transmission electron microscopy (TEM, JEOL JEM-3000) and high-resolution transmission electron microscopy (HRTEM, image Cs-corrected FEI Titan 80-300 kV at 300 kV). UV-vis DRS spectra were recorded with a UV-vis spectrophotometer (Shimadzu UV-2600). The specific surface area was determined by means of nitrogen gas adsorption based on the Brunauer-Emmett-Teller (BET) method, utilizing an Autosorb-iQ (Quantachrome). TGA (TA Instruments Q5000) was performed at a heating rate of 5 °C min<sup>-1</sup> under O<sub>2</sub> atmosphere.

*Electrochemical characterization.* The overall electrode composition was: 75 wt% active material, 20 wt% conductive carbon (Super C65®, TIMCAL), and 5 wt% sodium carboxymethyl cellulose (CMC, Dow Wolff Cellulosics). For the slurry preparation, CMC was dissolved in ultrapure water (1.25 wt% solution) and subsequently the Super C65 and the active material were added. The resulting mixture was dispersed by planetary ball milling for 2 h. Subsequently, the electrode paste was cast on dendritic copper foil (Schlenk, 99.9 %) with a wet film thickness of 120  $\mu\text{m}$  using a laboratory doctor blade. After drying overnight at room temperature, disc-shaped electrodes ( $\phi = 12 \text{ mm}$ ) were cut and dried under vacuum at 120 °C for 24 h. The electrode active material mass loading was around 1.5 mg cm<sup>-2</sup>. The electrochemical performance was evaluated in three-electrode Swagelok-type cells using lithium foil (Rockwood Lithium, battery grade) as counter and reference electrodes. Cells were assembled in an argon-filled glove box (MBraun UNILab, H<sub>2</sub>O and O<sub>2</sub> content < 0.1 ppm). The electrolyte consisted of a 1M solution of LiPF<sub>6</sub> in ethylene carbonate/diethyl carbonate (EC/DEC, 3:7 by volume). Prior to the electrochemical characterization, the cells were allowed to rest for 6 h. Cyclic voltammetry (CV) was carried out using a VMP3 potentiostat (BioLogic), applying 0.01 and 3.0 V as reversing potentials. Galvanostatic cycling (GC) tests were performed by means of a battery tester (Maccor 4300), setting

the cut-off voltages to 0.01 and 3.0 V vs. Li/Li<sup>+</sup>. All electrochemical measurements were performed in thermostatic climatic chambers at a temperature of 20 ± 1 °C. It is important to note that the mass of the carbon coating for SnO<sub>2</sub>-C, SFO-C, SMO-C, and SCO-C was included for the calculation of the specific capacity.

*In situ XRD analysis.* The *in situ* XRD experiments were carried out employing a self-designed *in situ* cell.<sup>3-5</sup> The composition of the eventually obtained electrodes was the same as for those used for the electrochemical characterization described earlier. In this case, however, the electrode paste was cast directly onto the beryllium (Be) disk with a thickness of 250 μm, acting simultaneously as current collector and “window” for X-ray beam. The coated Be electrode was dried at 50 °C under vacuum for 12 h. Lithium foil served as counter and reference electrode, while two layers of glass fiber (GF/D, Whatman) soaked with 500 μL of the electrolyte were used as separator. The *in situ* cell was allowed to rest for 12 h before starting the measurement. Galvanostatic cycling was performed using a potentiostat/galvanostat (SP-150, BioLogic), applying a specific current of 40 mA g<sup>-1</sup> within the 0.01 to 3.0 V voltage range. XRD analysis was carried out in a 2θ range of 20-80° with a time per scan of around 30 min.

**Table S1.** Structural parameters, average crystallite size, and disagreement indexes of the conducted Rietveld refinement for the XRD patterns of  $\text{SnO}_2$ ,  $\text{Sn}_{0.9}\text{Co}_{0.1}\text{O}_2$ ,  $\text{Sn}_{0.9}\text{Fe}_{0.1}\text{O}_2$ , and  $\text{Sn}_{0.9}\text{Mn}_{0.1}\text{O}_2$ , employing isotropic temperature factors and isotropic broadening of the reflections (potential errors are provided in brackets).

|                                    | <b>SnO<sub>2</sub></b> | <b>Sn<sub>0.9</sub>Co<sub>0.1</sub>O<sub>2</sub></b> | <b>Sn<sub>0.9</sub>Fe<sub>0.1</sub>O<sub>2</sub></b> | <b>Sn<sub>0.9</sub>Mn<sub>0.1</sub>O<sub>2</sub></b> |
|------------------------------------|------------------------|------------------------------------------------------|------------------------------------------------------|------------------------------------------------------|
| $a_0$ (Å)                          | 4.7399(1)              | 4.7403(1)                                            | 4.7392(1)                                            | 4.7367(1)                                            |
| $c_0$ (Å)                          | 3.1870 (1)             | 3.1856(1)                                            | 3.1853(1)                                            | 3.1836(1)                                            |
| $V_0$ (Å <sup>3</sup> )            | 71.601 (2)             | 71.582(1)                                            | 71.503(1)                                            | 71.428(1)                                            |
| <b>M-O (2x)</b>                    | 2.0279                 | 2.0199                                               | 2.0037                                               | 2.029                                                |
| <b>M-O (4x)</b>                    | 2.0716                 | 2.0764                                               | 2.0854                                               | 2.068                                                |
| <b>W Rp</b>                        | 6.63                   | 6.22                                                 | 6.83                                                 | 5.73                                                 |
| <b>Rp</b>                          | 5.27                   | 4.77                                                 | 5.26                                                 | 4.43                                                 |
| <b>R<sub>F</sub><sup>2</sup></b>   | 2.47                   | 2.12                                                 | 3.51                                                 | 1.85                                                 |
| <b>R<sub>F</sub></b>               | 1.44                   | 1.14                                                 | 2.03                                                 | 1.02                                                 |
| $c_0/a_0$                          | 0.6724                 | 0.6720                                               | 0.6721                                               | 0.6721                                               |
| <b>W.-H. intercept<sup>1</sup></b> | 0.0047                 | 0.0124                                               | 0.0094                                               | 0.0090                                               |
| <b>W.-H. slope<sup>1</sup></b>     | 0.0017                 | 0.0018                                               | 0.0014                                               | 0.0025                                               |
| <b>Crystallite size (nm)</b>       | 30                     | 11                                                   | 15                                                   | 16                                                   |

<sup>1</sup> Fitted intercepts and slope of the Williamson-Hall (W.-H.) plots, obtained by using the refined peak shape parameters.

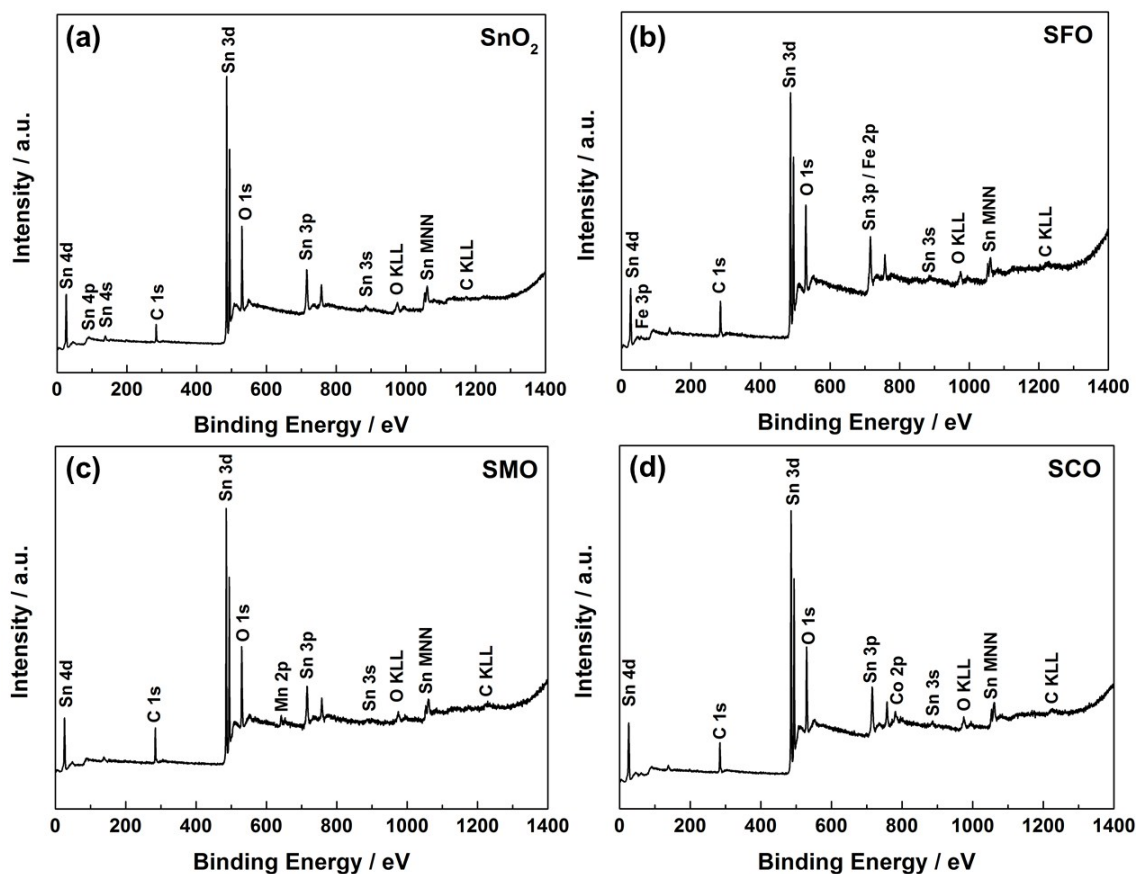

**Figure S1.** XPS survey spectra for (a)  $\text{SnO}_2$ , (b) SFO, (c) SMO, and (d) SCO, confirming the presence of tin and oxygen in all four samples and, in addition, iron, manganese, and cobalt for SFO, SMO, and SCO, respectively.

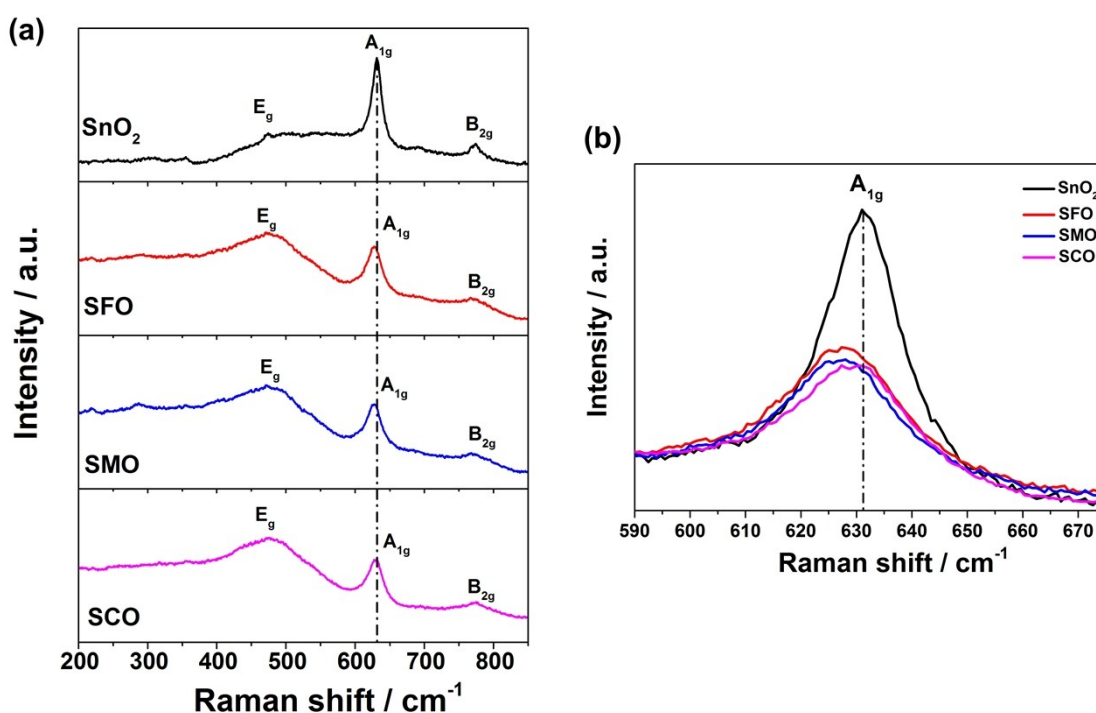

**Figure S2.** (a) Raman spectra of SnO<sub>2</sub>, SFO, SMO and SCO (from top to bottom; same color coding as for the XRD patterns in Figure 1a); (b) close-up for the A<sub>1g</sub> band of SnO<sub>2</sub>, SFO, SMO, and SCO.

Pure SnO<sub>2</sub> (Figure S2a, top panel, in black) shows three bands at around 475, 631, 774 cm<sup>-1</sup>, corresponding to the E<sub>g</sub> (translational), A<sub>1g</sub> (symmetric Sn-O stretching), and B<sub>2g</sub> (asymmetric Sn-O stretching) vibration mode, respectively, which is in good agreement with previous reports<sup>6,7</sup>. For the TM-doped samples, two main findings are observed: (i) The intensity maxima of the bands (in particular the A<sub>1g</sub> band) are slightly shifted to lower wavenumbers, as highlighted by the vertical dashed line in **Figure S2a** as well as in the close-up, presented in **Figure S2b**, which is explained by relatively smaller particle size. (ii) The bands are less intense and broadened, which is assigned as well to the decreased particle size and the reduced symmetry of the crystal structure due to the incorporation of the aliovalent TM dopant as well as the presence of oxygen vacancies to ensure charge neutrality<sup>8-13</sup>. The presence of oxygen vacancies apparently leads to an oxygen content of less than two oxygen per unit formula, which would be reflected in a slightly modified chemical composition, i.e., Sn<sub>0.9</sub>TM<sub>0.1</sub>O<sub>2-δ</sub>, with δ = 0.05 for a trivalent TM and 0.1 for a divalent TM. However, in the absence of a precise determination of the amount of oxygen vacancies, we continue to refer to Sn<sub>0.9</sub>TM<sub>0.1</sub>O<sub>2</sub> in the manuscript text.

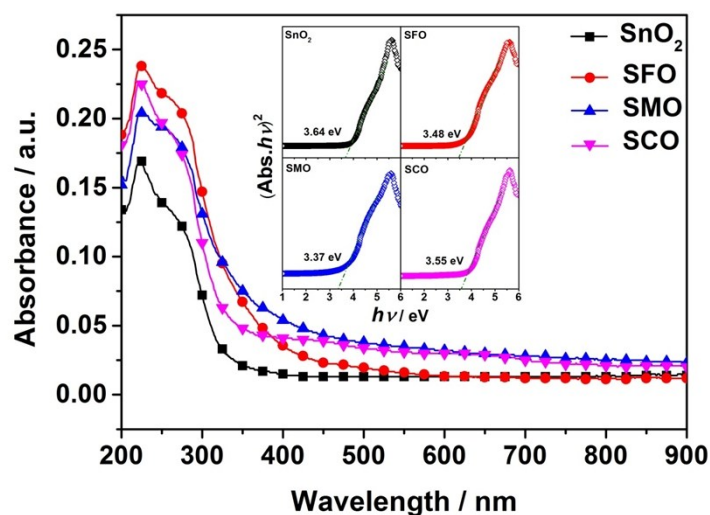

**Figure S3.** Ultraviolet-visible (UV-vis) absorption spectra for pure  $\text{SnO}_2$ , SFO, SMO, and SCO; as inset the corresponding plots for the determination of the band gap.

The band gap values can be determined according to the following equation<sup>14</sup>:  $\alpha h\nu = A (h\nu - E_g)^{n/2}$ , where  $E_g$  is the optical energy band gap,  $h\nu$  is the photon energy,  $\alpha$  is the absorption coefficient, and  $A$  is a proportionality constant;  $n$  is equal to 1 for a direct gap and equal to 4 for an indirect gap. The values of  $E_g$  for direct and indirect transitions can be obtained by linear relation and extrapolation. For pure  $\text{SnO}_2$ , we determined a band gap of 3.64 eV, which is in good agreement with previous studies<sup>15,16</sup>. Introducing cobalt into the structure leads to a slight decrease to 3.55 eV (SCO) and incorporating iron and manganese results in a further reduced band gap of 3.48 eV (SFO) and 3.37 eV (SMO). Generally, the finding of a reduced band gap for doped tin oxide is assigned to the introduction of anionic vacancies and the potentially mixed oxidation state of the cations<sup>12,13,17–20</sup>. This would be in good agreement with the Raman and XPS data. If the decrease in band gap, however, would be solely related to the presence of oxygen vacancies, which we assume are essentially a result of the required charge neutrality, the band gap should decrease in the order  $\text{SnO}_2 > \text{SMO} > \text{SFO} > \text{SCO}$ , i.e., along with the average oxidation state. The different order of  $\text{SnO}_2 > \text{SCO} > \text{SFO} > \text{SMO}$  determined here can, thus, only be explained, if we consider the average size of the cationic dopant (low spin values), which is about 0.69 Å for tetravalent tin, 0.66 Å for cobalt (average oxidation state of <3), 0.65 Å for trivalent iron, and 0.64 Å for manganese (average oxidation state of >3), and its impact on the unit cell volume, which is decreasing in the same order. We, thus, conclude that the governing effect in the present case is the potential overlap of electron orbitals due to the shorter distance between the cations.



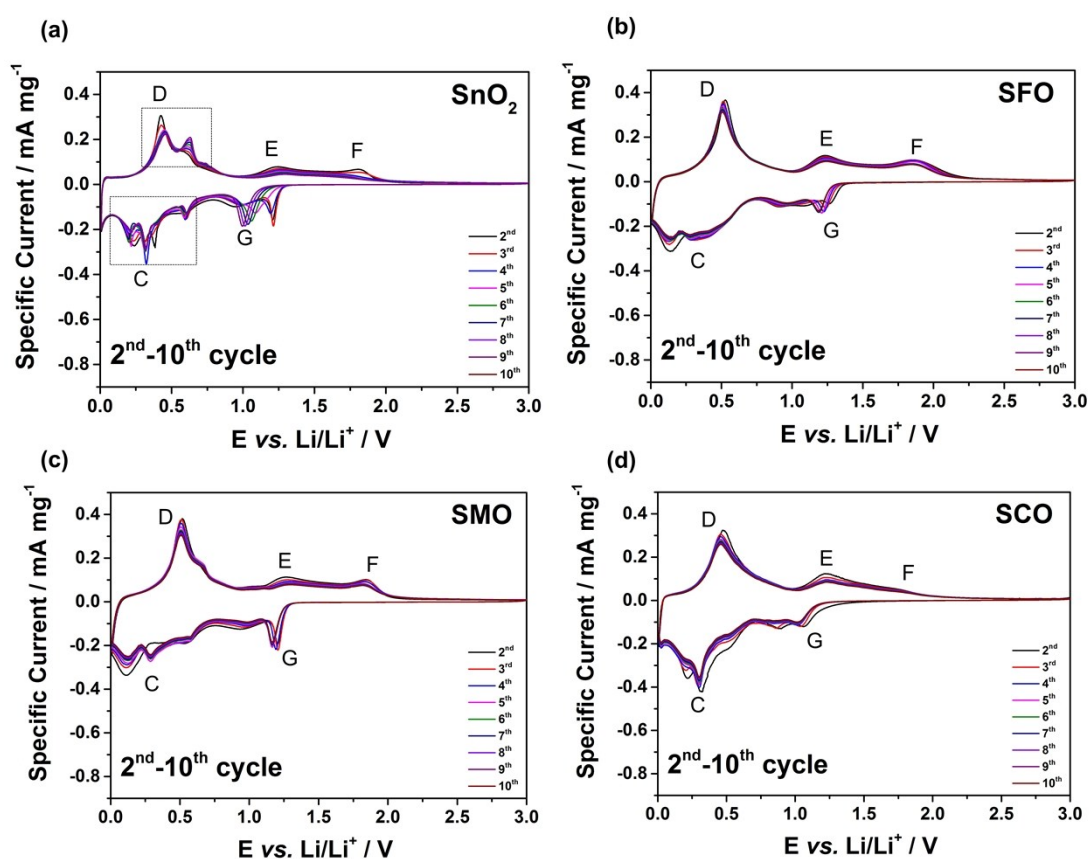

**Figure S4.** Cyclic voltammograms (2<sup>nd</sup> to 10<sup>th</sup> cyclic sweep) for electrodes based on (a) SnO<sub>2</sub>, (b) SFO, (c) SMO, and (d) SCO – the first cyclic sweep is presented in **Figure 3**. In all cases a sweep rate of 0.05 mV s<sup>-1</sup> was applied and the reversing voltages were set to 0.01 and 3.0 V vs. Li/Li<sup>+</sup>.

Following the first cyclic sweep presented in **Figure 3**, the subsequent CV sweeps reveal several characteristic changes. For pure SnO<sub>2</sub> (**Figure S4a**), the cathodic features (A) and (B) disappear, while a new peak appears at 1.21 V (G), ascribed to the reduction of SnO. The latter, however, shifts to lower potentials before eventually vanishing upon cycling. This shift and vanishing, in combination with the same observation for the corresponding peaks (E) and (F), indicates that the fraction of SnO<sub>2</sub> and SnO, formed upon delithiation continuously decreases upon cycling. At the same time, feature (C) and (D) become more distinct during cycling and split up into several peaks, associated with the different alloying and oxide phases, reflecting the formation of larger tin and tin/lithium alloy aggregates<sup>21–24</sup>, which is effectively suppressed in presence of the transition metal dopants (being in excellent agreement with the *in situ* XRD results). As a consequence, for TM-doped SnO<sub>2</sub>, the peaks (G), (E), and (F) appear to be more reversible compared to pure SnO<sub>2</sub>, while the de-/alloying related features (C) and (D) show less distinct peaks, though this slightly varies between the three samples. SFO (**Figure S4b**) shows only very broad features, but SMO (**Figure S4c**) and SCO (**Figure S4d**) present in addition some more pronounced peaks within this potential range. Generally, however, the TM doping substantially enhances the reversibility of all observed processes.

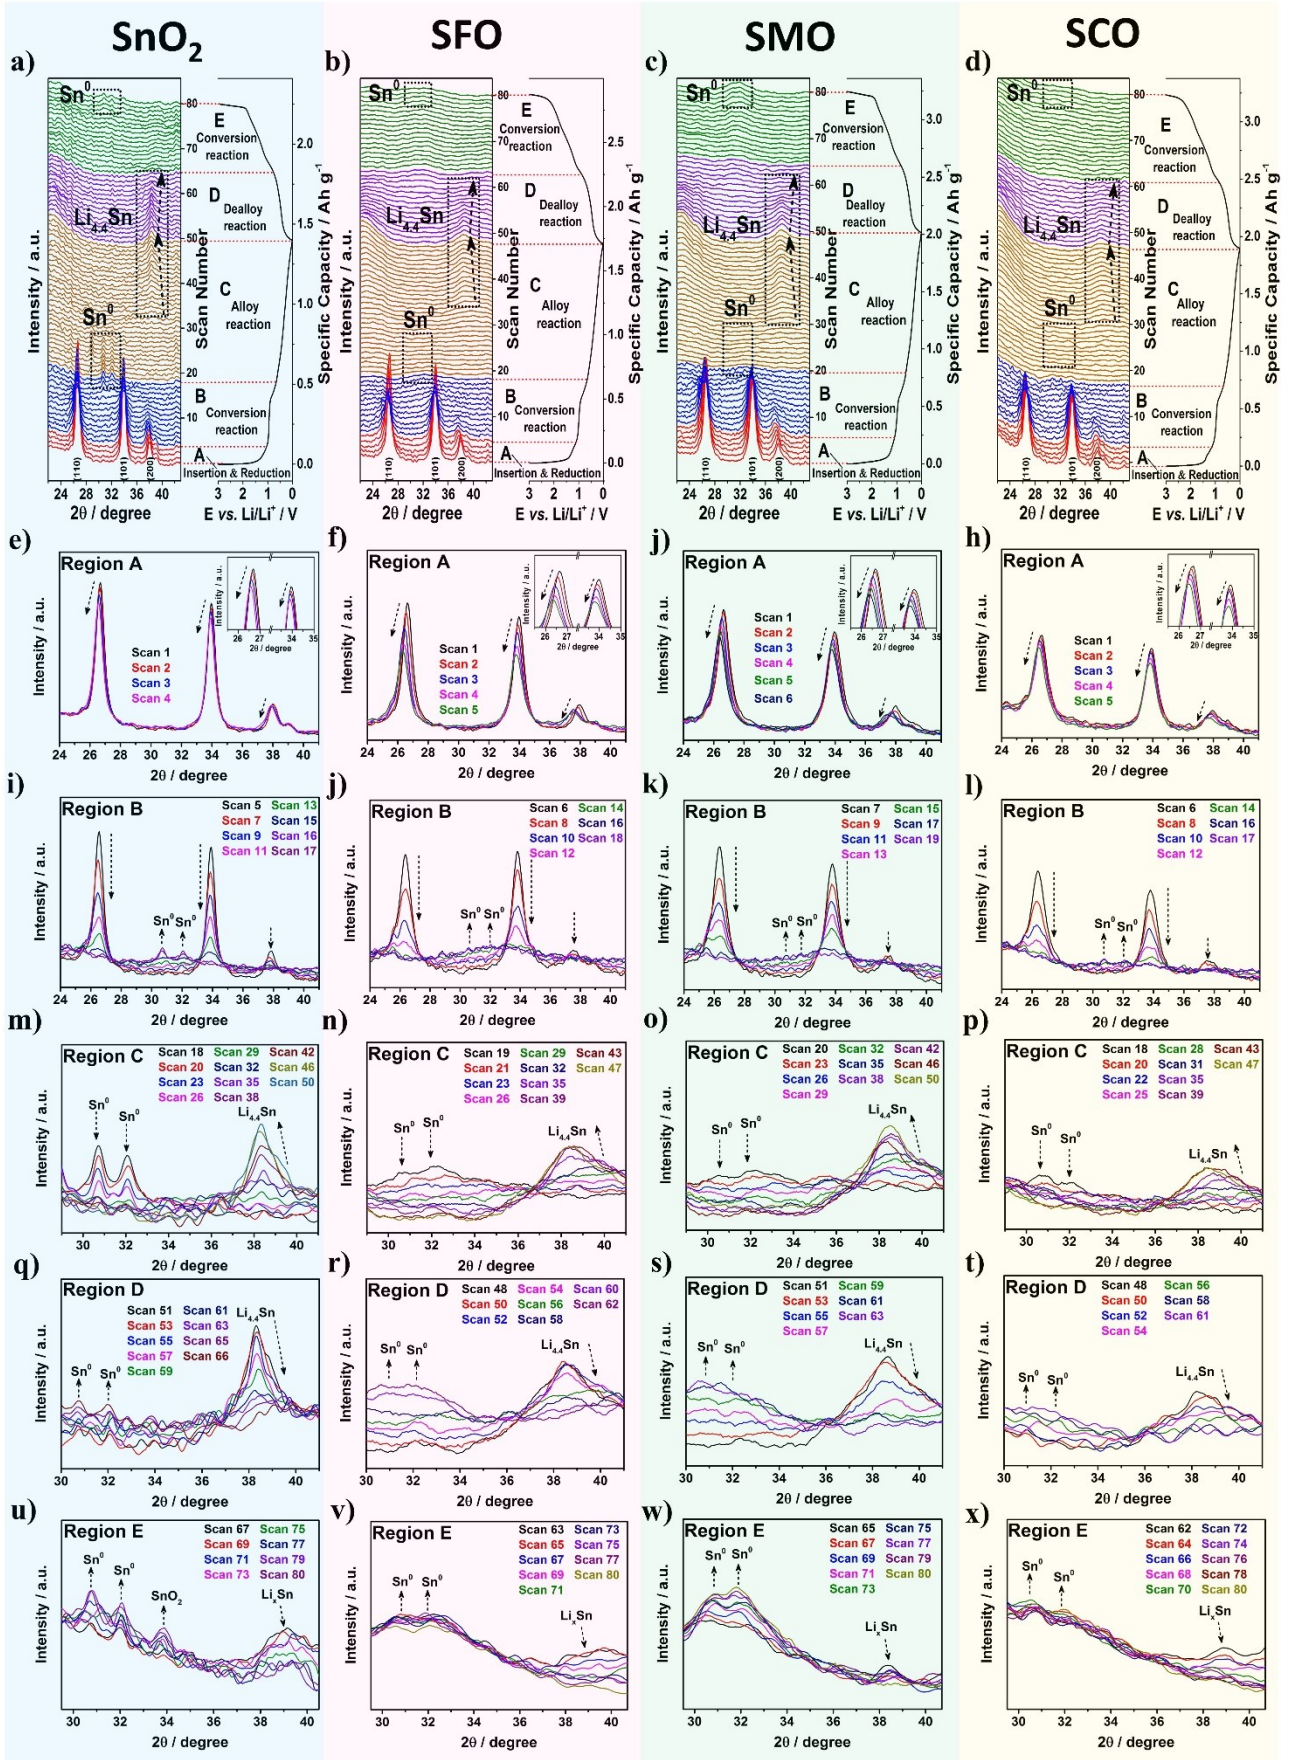

**Figure S5.** *In situ* XRD analysis of electrodes based on SnO<sub>2</sub> (blue background), SFO (pink background), SMO (green background), and SCO (yellow background): Panels (a) to (d) present the waterfall diagrams of consecutively recorded XRD patterns (left) and the corresponding galvanostatic dis-/charge profile for the first de-/lithiation cycle (right), all being at the top of the respective column. The scans referring to the different regions, as indicated for the aforementioned dis-/charge profiles are highlighted by different colors in the waterfall diagram: Region (A) in red, region (B) in blue, region (C) in orange, region (D) in purple, and region (E) in green. Below the waterfall diagrams and the corresponding dis-/charge profiles, close-ups of selected XRD patterns are provided – always in parallel for the four samples (the scale for the y and x axis are always kept constant for all samples to facilitate the comparison among them). Panels (e-h) depict the selected patterns for region (A) for all four electrodes; the given insets show the enlarged y axis between 25.5° and 35°. Panels (i-l) depict the close-ups of selected XRD patterns for region (B) for all four samples. Panels (m-p) depict close-ups of selected XRD patterns for region (C), panels (q-t) present close-ups of selected XRD patterns for region (D), and panels (u-x) depict close-ups of selected XRD patterns for region (E) for all four samples.

For a detailed analysis of the electrochemical reaction mechanism and the impact of the three dopants, we combined the galvanostatic lithiation and delithiation with XRD (**Figure S5**). The figure is organized as follows: At the top, the corresponding waterfall diagrams of the recorded XRD patterns are presented in combination with the simultaneously recorded dis-/charge profiles. These are divided in five regions (A) to (E), for which the panels given below present selected patterns – always in parallel for all four samples. Generally, region (A) covers the decrease in voltage from OCV to the onset of the potential plateau. Region (B) covers the potential plateau until the onset of the subsequent sloped profile, which is then referred to as region (C). The charge process is divided in region (D) and (E), while the cut is made when the slope of the potential profile changes.

Focusing on region (A) for SnO<sub>2</sub> (**Figure S5e**; scan 1-4), the evolution of the XRD patterns reveals a slight shift of the cassiterite-related reflections (110), (101), and (200) to lower  $2\theta$  values, accompanied by a slight decrease in intensity (as indicated by the arrows in the figure itself as well as in the corresponding inset). Such a shift may be assigned to a minor expansion of the SnO<sub>2</sub> lattice, e.g., as a consequence of some lithium ion insertion, while the decrease in intensity may be related to superficial reduction (e.g., the formation of Li<sub>2</sub>SnO<sub>3</sub><sup>25</sup>) – though to a minor extent at such high potentials. A comparison with SFO (**Figure S5f**), SMO (**Figure S5j**), and SCO (**Figure S5h**) indicates that this slight shift and decrease in intensity is more pronounced for the TM-doped samples, following the order SnO<sub>2</sub> < SCO < SMO < SFO. As this order is neither the same for the particle size (and accordingly the available surface area) nor the determined band gap (i.e., electronic conductivity) nor the oxidation state

of the dopant (and, hence, the assumed occurrence of oxygen vacancies), we propose that it is the sum of these characteristics that governs the initial lithium ion insertion and superficial reduction – even though the electronic conductivity appears to play a dominant role.

For the following XRD scans corresponding to region (B), pure SnO<sub>2</sub> shows a continuous decrease in intensity for all three reflections without any appreciable shift, until the reflections have eventually vanished completely at the end of the potential plateau (**Figure S5i**; scans 5-17). Concurrently, two new reflections appear at 30.7° and 32.1°, which gradually increase in intensity in the following. These reflections are related to metallic tin (JCPDS Card No. 89-2565), confirming the assignment of the potential plateau to the conversion reaction from SnO<sub>2</sub> to Sn<sup>0</sup> and Li<sub>2</sub>O. Essentially the same reaction is observed for SFO (**Figure S5j**), SMO (**Figure S5k**) and SCO (**Figure S5l**), but instead of distinct reflections for the metallic tin phase only a broad “bump” is observed. This suggests that the Sn<sup>0</sup> nanograins formed are much smaller in the presence of the TM dopant.

In region (C) for pure SnO<sub>2</sub> (**Figure S5m**; scans 18-50), the Sn<sup>0</sup>-related reflections vanish again. Furthermore, starting from scan 29 a new reflection appears at around 38.5°, which continuously increases in intensity and slightly shifts to lower 2θ values until it has reached its maximum intensity in the final scan #50. This observation is in good agreement with the formation of the lithium/tin alloy (Li<sub>x</sub>Sn with x ≤ 4.4) and an increasing lithium content, causing increasing lattice distances<sup>26–28</sup>. Similarly, the Sn<sup>0</sup>-related reflections are decreasing in intensity also for SFO (**Figure S5n**), SMO (**Figure S5o**), and SCO (**Figure S5p**) and a rather broad, new reflection appears at about 38.5°, which is continuously increasing in intensity and shifting to lower 2θ values, indicating that the same reaction occurs also for TM-doped SnO<sub>2</sub>. Once again, however, the intensity remains generally lower and the reflection is less sharp compared to pure SnO<sub>2</sub>. Remarkably, this is particularly true for SCO.

We may briefly summarize the main findings for the discharge process. Essentially, there are two major findings so far: (i) The presence of the TM dopant substantially decreases the crystallinity and/or particle size of the upon lithiation formed tin and lithium/tin alloy nanograins, while the overall reaction mechanism is the same. (ii) Cobalt appears to favor the nano-crystallinity of these tin phases slightly more than iron and manganese.

For the subsequent delithiation (i.e., charge process) in region (D), the reversed process is observed for pure SnO<sub>2</sub> (**Figure S5q**; scans 51-66). This means that the lithium/tin alloy-related reflection is decreasing in intensity, accompanied by a slight shift to larger 2θ values and the re-appearance of the two reflections corresponding to metallic tin, even though the latter two remain less intense compared to the beginning of region (C). For SFO (**Figure S5r**), SMO (**Figure S5s**), and SCO (**Figure S5t**), once again the same reaction is observed, but the re-appearance of metallic tin is reflected in a rather broad reflection, i.e., far less distinct compared to pure SnO<sub>2</sub>. Also, the crystallinity and/or crystallite size appears to be less, once more, for SCO in relation to SFO and SMO.

In region (E), this de-alloying reaction continues for pure SnO<sub>2</sub> (**Figure S5u**; scans 67-80) and, in addition, a new reflection appears at around 33.8°, which indicates the re-oxidation of metallic tin to

cassiterite-structured tin oxide. This re-oxidation is further indicated by the appearance of a very broad reflection in the range from 29° to 36°, potentially related to the re-appearance of the (101) reflection. Nevertheless, this re-oxidation remains incomplete, as the Sn<sup>0</sup>-related reflections do not completely disappear even in the fully charged state (i.e., 3.0 V). As a matter of fact, the reversibly obtained capacity is only 850 mAh g<sup>-1</sup>, which is substantially lower than the theoretically expected value of 1493 mAh g<sup>-1</sup>, when considering the alloying and conversion reaction. SFO (**Figure S5v**), SMO (**Figure S5w**), and SCO (**Figure S5x**) show the same trend basically, but no distinct reflections are observed for any of the phases and the re-oxidation is only indicated by the appearance of a very broad reflection in the range from 29° to 36°. The reversibly obtained capacities, however, indicate that the re-oxidation process is significantly enhanced in presence of the TM dopant. For SFO the final charge capacity is 1167 mAh g<sup>-1</sup>, for SMO it is 1233 mAh g<sup>-1</sup>, and for SCO even 1337 mAh g<sup>-1</sup>, which is rather close to the theoretical maxima of 1477, 1478, and 1474 mAh g<sup>-1</sup>, respectively.

Based on the previous findings we thus assume that the TM dopant forms a continuous percolating network of electronically conductive metallic nanograins, as reported earlier for pure conversion materials<sup>29,30</sup>. This conductive network favors the occurring electrochemical reactions – both the alloying and conversion – by preventing the formation of relatively large tin and lithium/tin alloy nanoparticles and ensuring the electron transport throughout the whole initial primary particle<sup>31</sup>.

In conclusion, we may summarize the above described findings as follows:

### Section A

*(OCV to 1.04 V (SnO<sub>2</sub>) or to 1.08 V (SFO, SMO, SCO); insertion and superficial reduction)*

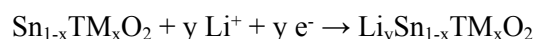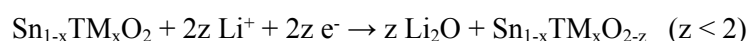

In fact, if the insertion occurs only at the surface and is accompanied by a partial reduction of the oxide, these two processes may occur simultaneously according to the following reaction mechanism:

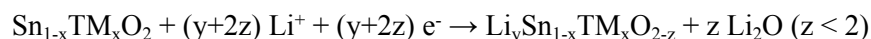

### Section B

*(1.04 – 0.73 V (SnO<sub>2</sub>) or 1.08 – 0.65 V (SFO, SMO) and 1.08 – 0.70 V (SCO); conversion)*

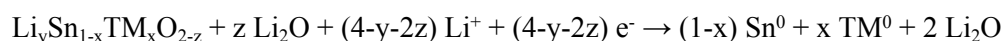

### Section C

*(0.73 – 0.01 V (SnO<sub>2</sub>) and 0.65 – 0.01 V (SFO, SMO) and 0.70 – 0.01 (SCO); alloying)*

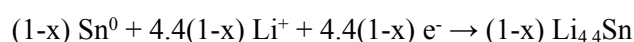



## Section D

(0.01-0.83 V; dealloying)\*

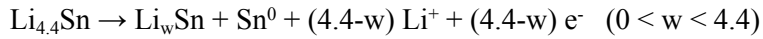

## Section E

(0.83-3.0 V; dealloying and re-oxidation)\*

For  $\text{SnO}_2$ :

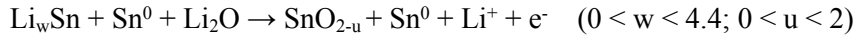

For  $\text{Sn}_{1-x}\text{TM}_x\text{O}_2$ :

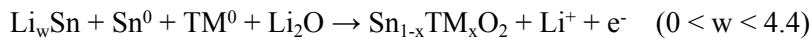

or

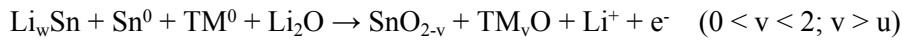

*\*These reactions are given in a rather qualitative manner, since the precise fraction of the two tin phases ( $\text{Li}_w\text{Sn}$  and  $\text{Sn}^0$ ) is not quantifiable from our data. Also, adding many variables will essentially dilute the key message.*

For the subsequent charge, i.e., delithiation process, it is assumed that the re-oxidized species are the pure oxides (second equation) rather than a mixed one (first equation) in case of  $\text{Sn}_{1-x}\text{TM}_x\text{O}_2$ , although the final experimental confirmation still needs to be provided.

**Table S2.** Specific capacities (in mAh g<sup>-1</sup>) for SnO<sub>2</sub>, SFO, SCO, and SMO as a function of the anodic cut-off voltage (in V; see also **Figure 4c**).

| Active material // Anodic cut-off | 0.5 V | 1.0 V | 1.5 V | 2.0 V |
|-----------------------------------|-------|-------|-------|-------|
| SnO <sub>2</sub>                  | 226   | 489   | 686   | 827   |
| SFO                               | 273   | 574   | 816   | 1051  |
| SCO                               | 298   | 621   | 898   | 1155  |
| SMO                               | 296   | 655   | 955   | 1185  |

**Table S3.** Gravimetric energy densities (in Wh kg<sup>-1</sup>) for SnO<sub>2</sub>, SFO, SCO, and SMO as a function of the anodic cut-off voltage (in V; see also **Figure 4d**), assuming a theoretical LiNi<sub>0.5</sub>Mn<sub>1.5</sub>O<sub>4</sub> cathode with a (constant) discharge potential of 4.7 V and a specific capacity of 140 mAh g<sup>-1</sup> (anode/cathode ratio of 1:1 in specific capacity).

| Active material // Anodic cut-off | 0.5 V | 1.0 V | 1.5 V | 2.0 V |
|-----------------------------------|-------|-------|-------|-------|
| SnO <sub>2</sub>                  | 374   | 453   | 460   | 454   |
| SFO                               | 403   | 469   | 472   | 461   |
| SCO                               | 411   | 476   | 477   | 463   |
| SMO                               | 411   | 479   | 480   | 472   |

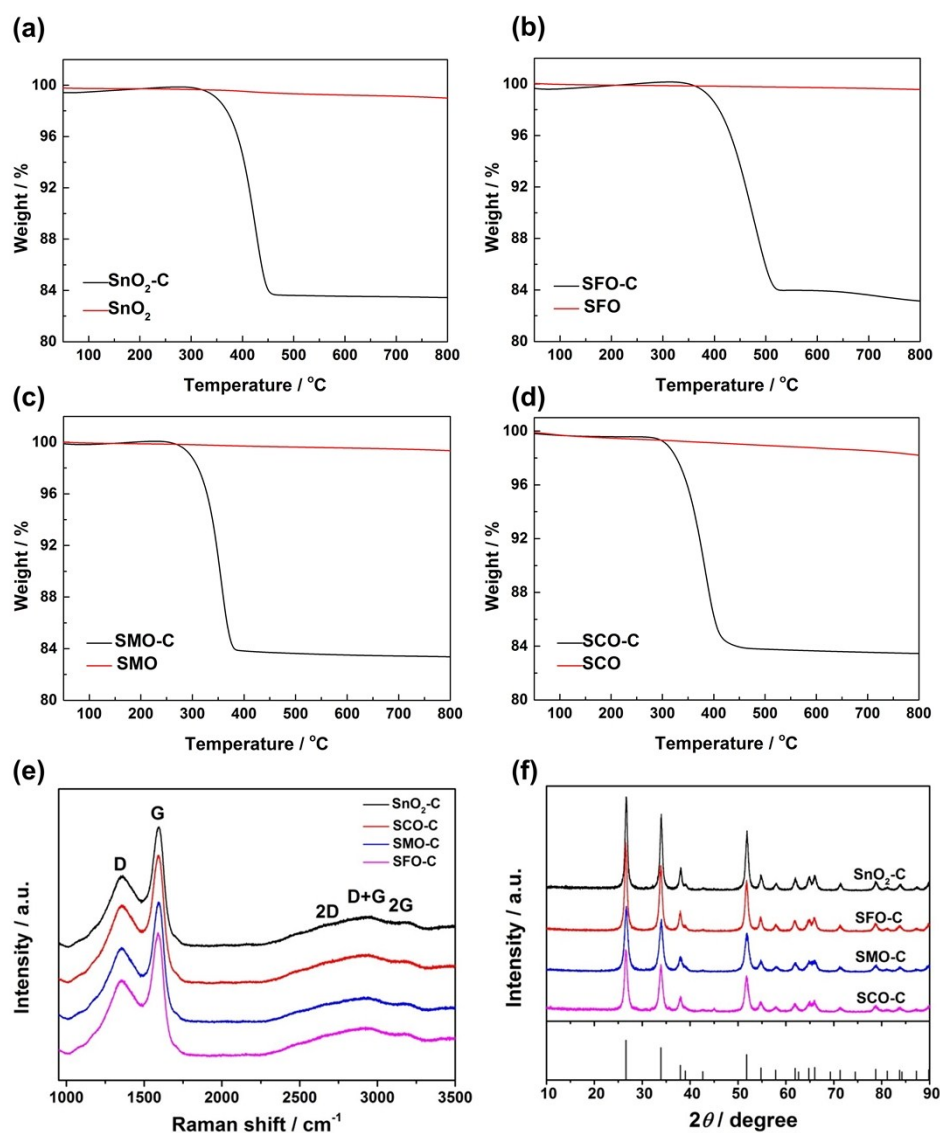

**Figure S6.** TGA curves for the carbon-coated samples (in black) and the corresponding non-coated sample, serving as reference (in red): (a) SnO<sub>2</sub>-C and SnO<sub>2</sub>, (b) SFO-C and SFO, (c) SMO-C and SMO, and (d) SCO-C and SCO. (e) and (f) Characterization of the carbon-coated samples by (e) Raman spectroscopy and (f) XRD (from top to bottom: SnO<sub>2</sub>-C (in black), SFO-C (in red), SMO-C (in blue), and SCO-C (in pink); (f) as reference given in the bottom: JCPDS Card No. 01-077-0447).

The carbon content for the coated samples (denoted as SnO<sub>2</sub>-C, SFO-C, SMO-C, and SCO-C) was about 16 wt% in all cases (**Figure S6a-6d**), which has been proven to be a suitable amount of carbon for improving the electrode performance<sup>32</sup>. The Raman spectra (**Figure S6e**) show essentially the same features for all four samples, i.e., the characteristic D- and G-band at around 1350 cm<sup>-1</sup> and 1585 cm<sup>-1</sup>, which are related to the disorder-induced phonon mode and graphitic C-C stretching, respectively<sup>33,34</sup>. Additionally, at higher wavenumbers the 2D, D+G, and 2G bands, occurring respectively at about 2685 cm<sup>-1</sup>, 2935 cm<sup>-1</sup>, and 3180 cm<sup>-1</sup>, are observed, indicating a rather high degree of sp<sup>2</sup>-hybridized



carbon<sup>4,35</sup>. The obtained XRD patterns (**Figure S6f**) do not reveal any significant difference compared to those obtained for the non-coated samples (**Figure 1a**) – apart from a slightly increased crystallinity, presumably, due to the additional thermal treatment to carbonize the glucose precursor.

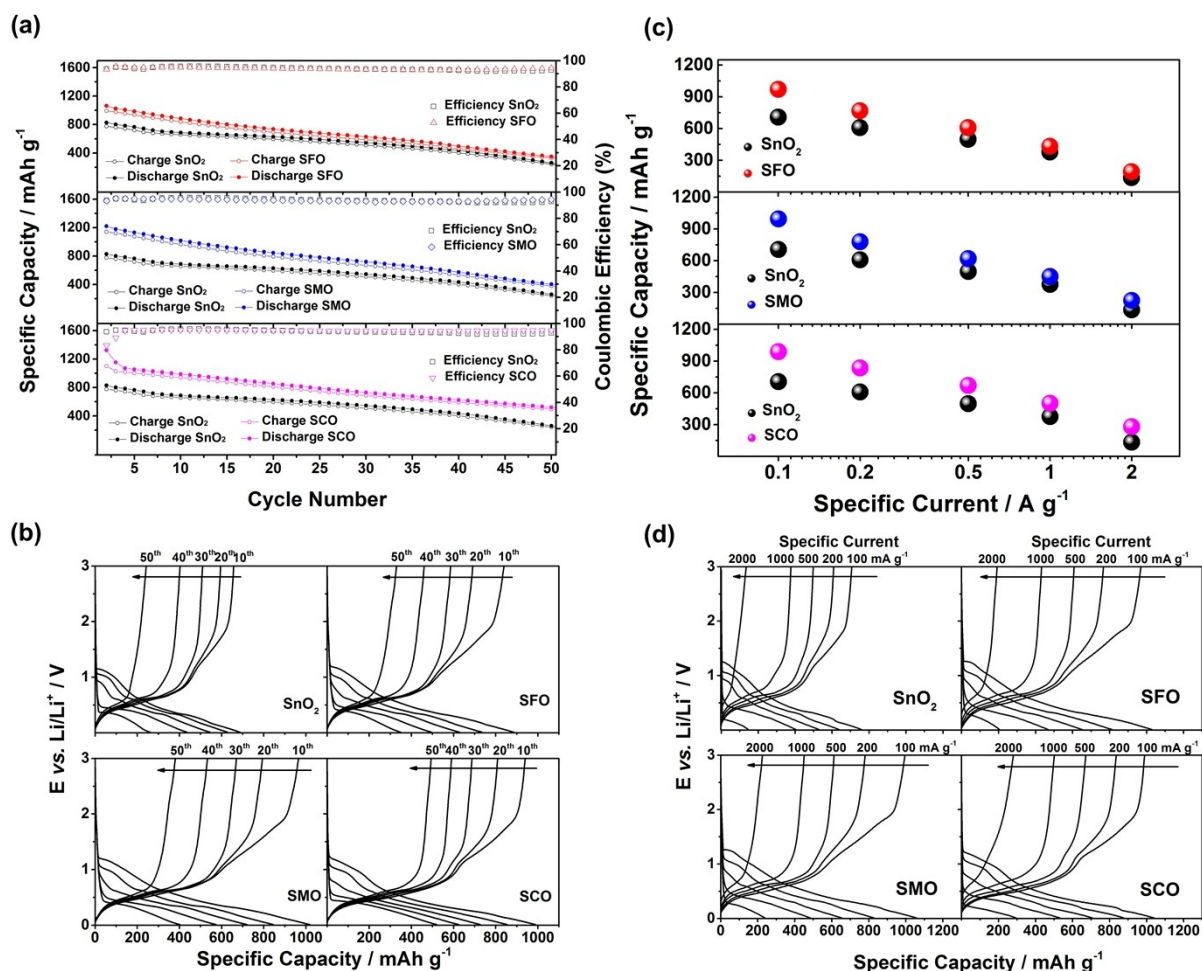

**Figure S7.** Galvanostatic cycling of electrodes based on SnO<sub>2</sub> (in black), SFO (in red), SMO (in blue), and SCO (in pink): (a) Constant current cycling for all four samples at 100 mA g<sup>-1</sup>, plotting the specific dis-/charge capacity and coulombic efficiency vs. the cycle number (1<sup>st</sup> cycle not shown); (b) The corresponding dis-/charge profiles for the 10<sup>th</sup>, 20<sup>th</sup>, 30<sup>th</sup>, 40<sup>th</sup>, and 50<sup>th</sup> cycle (from top left to bottom right: SnO<sub>2</sub>, SFO, SMO, and SCO); (c) Comparison of the rate capability (specific capacity vs. applied specific current; logarithmic scale) – the given capacity values are averaged over 10 cycles applying the same current; (d) The corresponding dis-/charge profiles for the 5<sup>th</sup> cycle for each dis-/charge rate (from top left to bottom right: SnO<sub>2</sub>, SFO, SMO, and SCO).

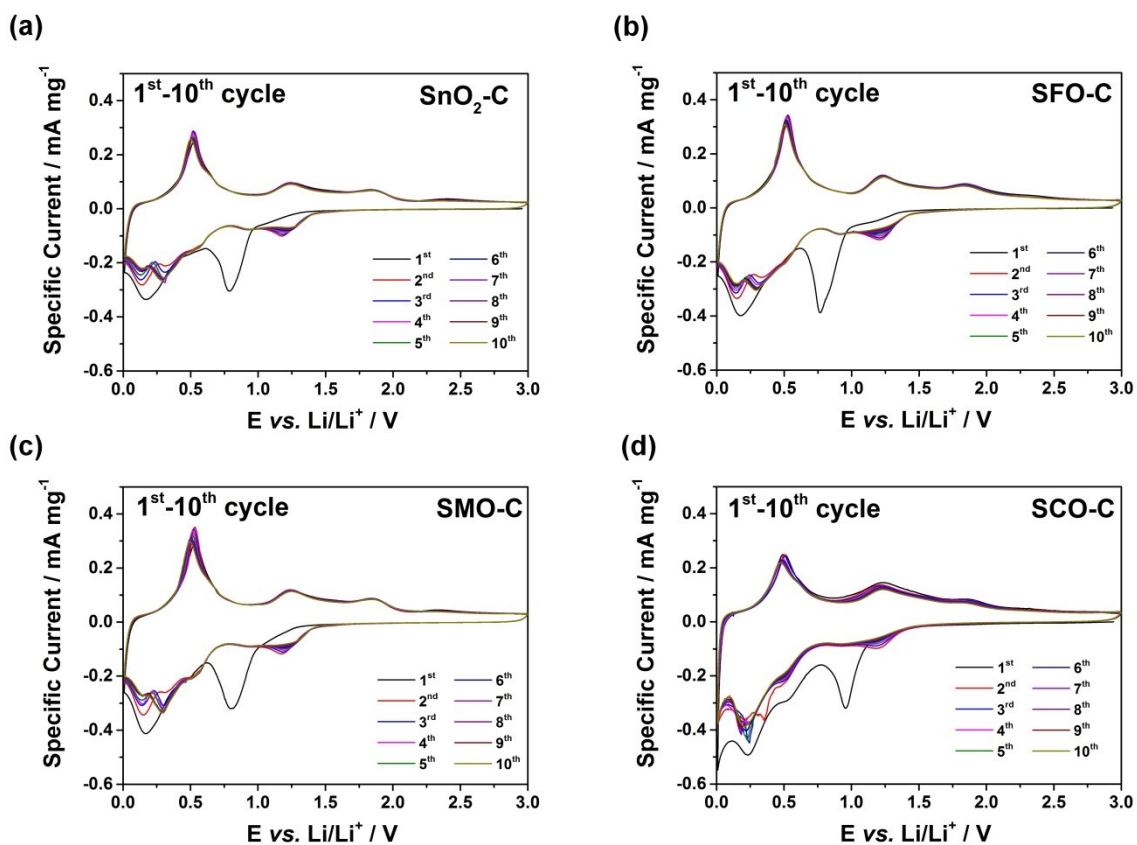

**Figure S8.** Cyclic voltammograms (10 continuous cyclic sweeps) of (a) SnO<sub>2</sub>-C, (b) SFO-C, (c) SMO-C, and (d) SCO-C (sweep rate: 0.05 mV s<sup>-1</sup>; reversing voltages: 0.01 and 3.0 V vs. Li/Li<sup>+</sup>).

## References

- 1 A. C. Larson and R. B. Von Dreele, *Gen Struct Anal Syst Rep LAUR*, 1994, 86–748.
- 2 A. A. Bolzan, C. Fong, B. J. Kennedy and C. J. Howard, *Acta Crystallogr. B*, 1997, **53**, 373–380.
- 3 Y. Ma, Y. Ma, D. Bresser, Y. Ji, D. Geiger, U. Kaiser, C. Streb, A. Varzi and S. Passerini, *ACS Nano*, DOI:10.1021/acsnano.8b03188.
- 4 D. Bresser, E. Paillard, R. Kloepsch, S. Krueger, M. Fiedler, R. Schmitz, D. Baither, M. Winter and S. Passerini, *Adv. Energy Mater.*, 2013, **3**, 513–523.
- 5 Y. Ma, Y. Ma, D. Geiger, U. Kaiser, H. Zhang, G.-T. Kim, T. Diemant, R. J. Behm, A. Varzi and S. Passerini, *Nano Energy*, 2017, **42**, 341–352.
- 6 P. S. Peercy and B. Morosin, *Phys. Rev. B*, 1973, **7**, 2779.
- 7 X. Mathew, J. P. Enriquez, C. Mejía-García, G. Contreras-Puente, M. A. Cortes-Jacome, J. A. Toledo Antonio, J. Hays and A. Punnoose, *J. Appl. Phys.*, 2006, **100**, 073907.
- 8 A. Azam, A. S. Ahmed, S. S. Habib and A. H. Naqvi, *J. Alloys Compd.*, 2012, **523**, 83–87.
- 9 J. Kaur, J. Shah, R. K. Kotnala and K. C. Verma, *Ceram. Int.*, 2012, **38**, 5563–5570.
- 10 A. Bouaine, N. Brihi, G. Schmerber, C. Ulhaq-Bouillet, S. Colis and A. Dinia, *J. Phys. Chem. C*, 2007, **111**, 2924–2928.
- 11 K. Srinivas, M. Vithal, B. Sreedhar, M. M. Raja and P. V. Reddy, *J. Phys. Chem. C*, 2009, **113**, 3543–3552.
- 12 P. Chetri, B. Saikia and A. Choudhury, *J. Appl. Phys.*, 2013, **113**, 233514.
- 13 W. Ben Haj Othmen, B. Sieber, H. Elhouichet, A. Addad, B. Gelloz, M. Moreau, S. Szunerits and R. Boukherroub, *Mater. Sci. Semicond. Process.*, 2018, **77**, 31–39.
- 14 T. P. Gujar, V. R. Shinde, C. D. Lokhande, R. S. Mane and S.-H. Han, *Appl. Surf. Sci.*, 2005, **250**, 161–167.
- 15 M. Batzill and U. Diebold, *Prog. Surf. Sci.*, 2005, **79**, 47–154.
- 16 K.-M. Li, Y.-J. Li, M.-Y. Lu, C.-I. Kuo and L.-J. Chen, *Adv. Funct. Mater.*, 2009, **19**, 2453–2456.
- 17 Y. Yan, F. Du, X. Shen, Z. Ji, X. Sheng, H. Zhou and G. Zhu, *J. Mater. Chem. A*, 2014, **2**, 15875–15882.
- 18 S. Samson and C. G. Fonstad, *J. Appl. Phys.*, 1973, **44**, 4618–4621.
- 19 N. Li, K. Du, G. Liu, Y. Xie, G. Zhou, J. Zhu, F. Li and H.-M. Cheng, *J. Mater. Chem. A*, 2013, **1**, 1536–1539.
- 20 H. Wang, K. Dou, W. Y. Teoh, Y. Zhan, T. F. Hung, F. Zhang, J. Xu, R. Zhang and A. L. Rogach, *Adv. Funct. Mater.*, 2013, **23**, 4847–4853.
- 21 I. A. Courtney and J. R. Dahn, *J. Electrochem. Soc.*, 1997, **144**, 2943–2948.
- 22 I. A. Courtney, W. R. McKinnon and J. R. Dahn, *J. Electrochem. Soc.*, 1999, **146**, 59–68.
- 23 R. Retoux, T. Brousse and D. M. Schleich, *J. Electrochem. Soc.*, 1999, **146**, 2472–2476.
- 24 C.-M. Wang, W. Xu, J. Liu, J.-G. Zhang, L. V. Saraf, B. W. Arey, D. Choi, Z.-G. Yang, J. Xiao, S. Thevuthasan and D. R. Baer, *Nano Lett.*, 2011, **11**, 1874–1880.
- 25 G. Ferraresi, C. Villeveille, I. Czekaj, M. Horisberger, P. Novák and M. El Kazzi, *ACS Appl. Mater. Interfaces*, 2018, **10**, 8712–8720.
- 26 I. A. Courtney and J. R. Dahn, *J. Electrochem. Soc.*, 1997, **144**, 2045–2052.
- 27 O. Mao, R. A. Dunlap and J. R. Dahn, *J. Electrochem. Soc.*, 1999, **146**, 405–413.
- 28 I. A. Courtney, R. A. Dunlap and J. R. Dahn, *Electrochimica Acta*, 1999, **45**, 51–58.
- 29 F. Wang, R. Robert, N. A. Chernova, N. Pereira, F. Omenya, F. Badway, X. Hua, M. Ruotolo, R. Zhang, L. Wu, V. Volkov, D. Su, B. Key, M. S. Whittingham, C. P. Grey, G. G. Amatucci, Y. Zhu and J. Graetz, *J. Am. Chem. Soc.*, 2011, **133**, 18828–18836.
- 30 L. Li, F. Meng and S. Jin, *Nano Lett.*, 2012, **12**, 6030–6037.
- 31 D. Bresser, S. Passerini and B. Scrosati, *Energy Env. Sci*, 2016, **9**, 3348–3367.
- 32 Y. Ma, Y. Ma, U. Ulissi, Y. Ji, C. Streb, D. Bresser and S. Passerini, *Electrochimica Acta*, 2018, **277**, 100–109.
- 33 Y. Ma, H. Wang, S. Ji, J. Goh, H. Feng and R. Wang, *Electrochimica Acta*, 2014, **133**, 391–398.
- 34 Y. Ma, H. Wang, H. Feng, S. Ji, X. Mao and R. Wang, *Electrochimica Acta*, 2014, **142**, 317–323.
- 35 D. Bresser, F. Mueller, M. Fiedler, S. Krueger, R. Kloepsch, D. Baither, M. Winter, E. Paillard and S. Passerini, *Chem. Mater.*, 2013, **25**, 4977–4985.
